# Supplementary material for: Miniature Inverted-Repeat Transposable Elements ofStowawayAre Active in Potato
Source: Oxford University Press journal article supplement (doi:10.1534/genetics.110.117606), 2010-07-08
Supplement: figures1.pdf [file figures1.pdf]

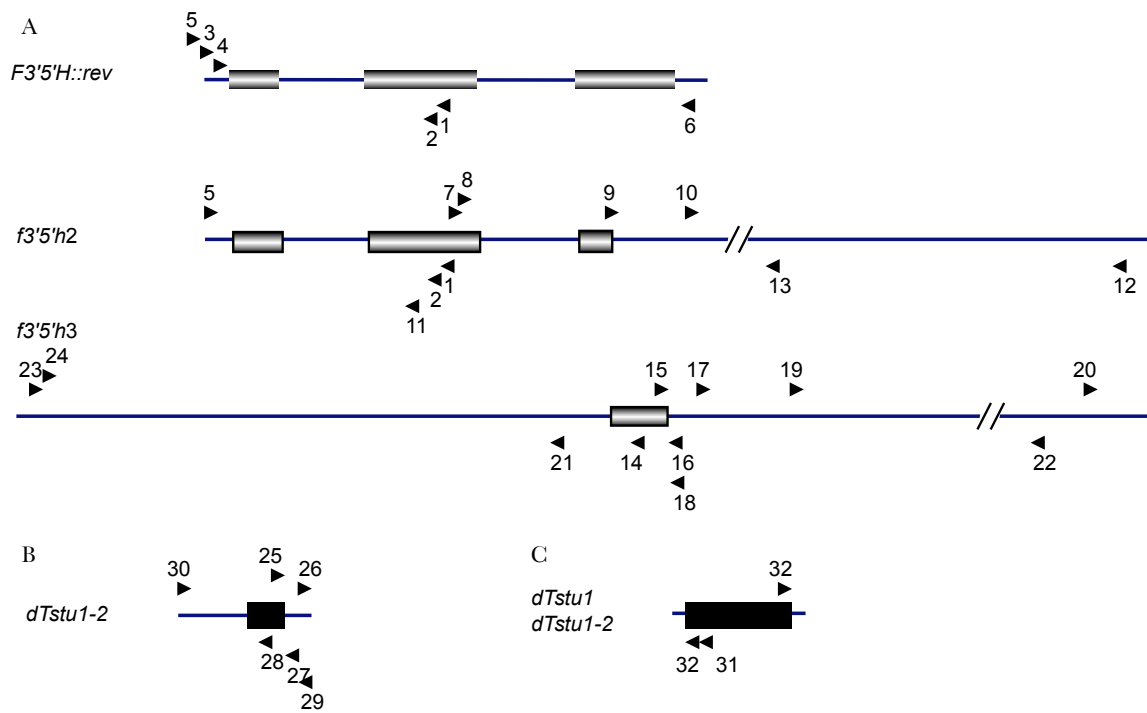

FIGURE S1.—Approximate positions of primers used in this study. Arrow heads show primers and their directions used for the analysis of (A) *F3'5'H* (pseudo) genes as described in supplementary methods, (B) the insertion locus of *dTstu1-2* and (C) MITE display. Coding regions are marked by shaded boxes and the *Stowaway* MITE is indicated by a black bar.
