# Supplementary material for: Miniature Inverted-Repeat Transposable Elements ofStowawayAre Active in Potato
Source: Oxford University Press journal article supplement (doi:10.1534/genetics.110.117606), 2010-07-08
Supplement: figures2.pdf [file figures2.pdf]

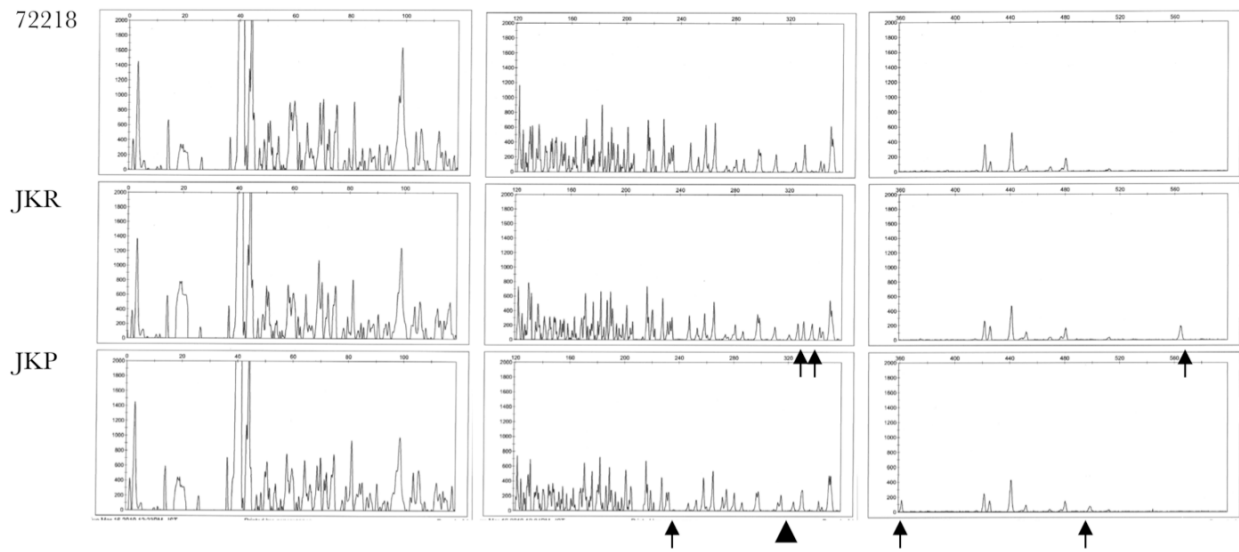

FIGURE S2.—MITE display using primers designed from sequences of *dTstu1* and *dTstu1-2*. Mse+T was used as a selective primer. The left panels show peaks from 0 base to 120 bases, the middle from 120 to 360 bases and the right from 360 to 600 bases. Differences of 'JKR' and 'JKP' as compared with '72218' are indicated by arrows. An arrowhead shows a new peak of 315 bases in size.
