# Supplementary material for: Miniature Inverted-Repeat Transposable Elements ofStowawayAre Active in Potato
Source: Oxford University Press journal article supplement (doi:10.1534/genetics.110.117606), 2010-07-08
Supplement: figures3.pdf [file figures3.pdf]

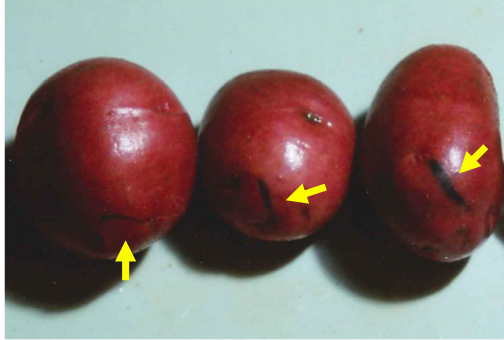

FIGURE S3.—Tuber appearance of one of the plants regenerated from protoplasts of ‘72218’. Arrows indicate purple variegation (which appear as a dark line in the picture) present against the red background.
