# Supplementary material for: Miniature Inverted-Repeat Transposable Elements ofStowawayAre Active in Potato
Source: Oxford University Press journal article supplement (doi:10.1534/genetics.110.117606), 2010-07-08
Supplement: tables1.pdf [file tables1.pdf]

**TABLE S1****Primer sequences used in this study**

| Primer | Sequence                                 |
|--------|------------------------------------------|
| 1      | 5'-AACATTTTGTGCAATAAAKCATCAAA-3'         |
| 2      | 5'-CCTTGTAATCCATCCAAGCTA-3'              |
| 3      | 5'-CCGAATTCAAGCTTTATATTATATCTTCGATTTT-3' |
| 4      | 5'-GGCATTACGTATTAGTGAGTTG-3'             |
| 5      | 5'-CCTTCTACTTCATTCTCACTCT-3'             |
| 6      | 5'-AGCAAATATGTTGCACTATAAATG-3'           |
| 7      | 5'-CCTGATTTTCTTGATKTRTTATGG-3'           |
| 8      | 5'-GGGATAATTCTGAAGGAGAAAG-3'             |
| 9      | 5'-TATTCCAAGTTGTTGACACCCA-3'             |
| 10     | 5'-ACTGAAGTAGCCATCCAAAGAC-3'             |
| 11     | 5'-TCAACGAACACTCTCTTACTTAA-3'            |
| 12     | 5'-GCTCACTACACAATGCACATG-3'              |
| 13     | 5'-TCATGAAATGCATCGACAATTTAT-3'           |
| 14     | 5'-GCTAATCCAAAAGATTCCCTCCA-3'            |
| 15     | 5'-TGCAAAAAGCTGTCCCTCTTG-3'              |
| 16     | 5'-TTACGTTACGGTCTTCAACAG-3'              |
| 17     | 5'-AGAGGAGGATAACAAACTTGTAT-3'            |
| 18     | 5'-AACAGATACGTTGCACTATAACT-3'            |
| 19     | 5'-CCTAGTCCCCATTTCACTACA-3'              |
| 20     | 5'-GAACATGAGTTTACGTGAACCC-3'             |
| 21     | 5'-AGGCATCCTTCGAAATCCACA-3'              |
| 22     | 5'-TTGTAAAGTGCACCCATCATCT-3'             |
| 23     | 5'-CATTCGTCCCTAACGATGGACA-3'             |
| 24     | 5'-ATTCAGATCCTCCCGATGAATT-3'             |
| 25     | 5'-ATTCATTTTGGACCACAAGTTTAA-3'           |
| 26     | 5'-TGTTTTTTGCAGTTATCTTATTTCA-3'          |
| 27     | 5'-CAAGGGGAGACATTTAGG-3'                 |
| 28     | 5'-AGACATTTTCATAGGCAAAATGTTA-3'          |
| 29     | 5'-AGCTGAAATATGAGATTGAAATTAG-3'          |
| 30     | 5'-ATTTTGCTATATCCACAATGACTT-3'           |
| 31     | 5'-CATTCTTTTTGGGACTGACTA-3'              |
| 32     | 5'-ATAAAWTGGGACRGAGGGAGTA-3'             |
| Mse+0  | 5'-GACGATGAGTCCTGAGTAA-3'                |
| Mse+N  | 5'-GACGATGAGTCCTGAGTAAN-3'               |
